# Supplementary material for: A newly noninvasive model for prediction of non-alcoholic fatty liver disease: utility of serum prolactin levels
Source: Springer Nature journal article supplement (doi:10.1186/s12876-019-1120-z), 2019-11-27

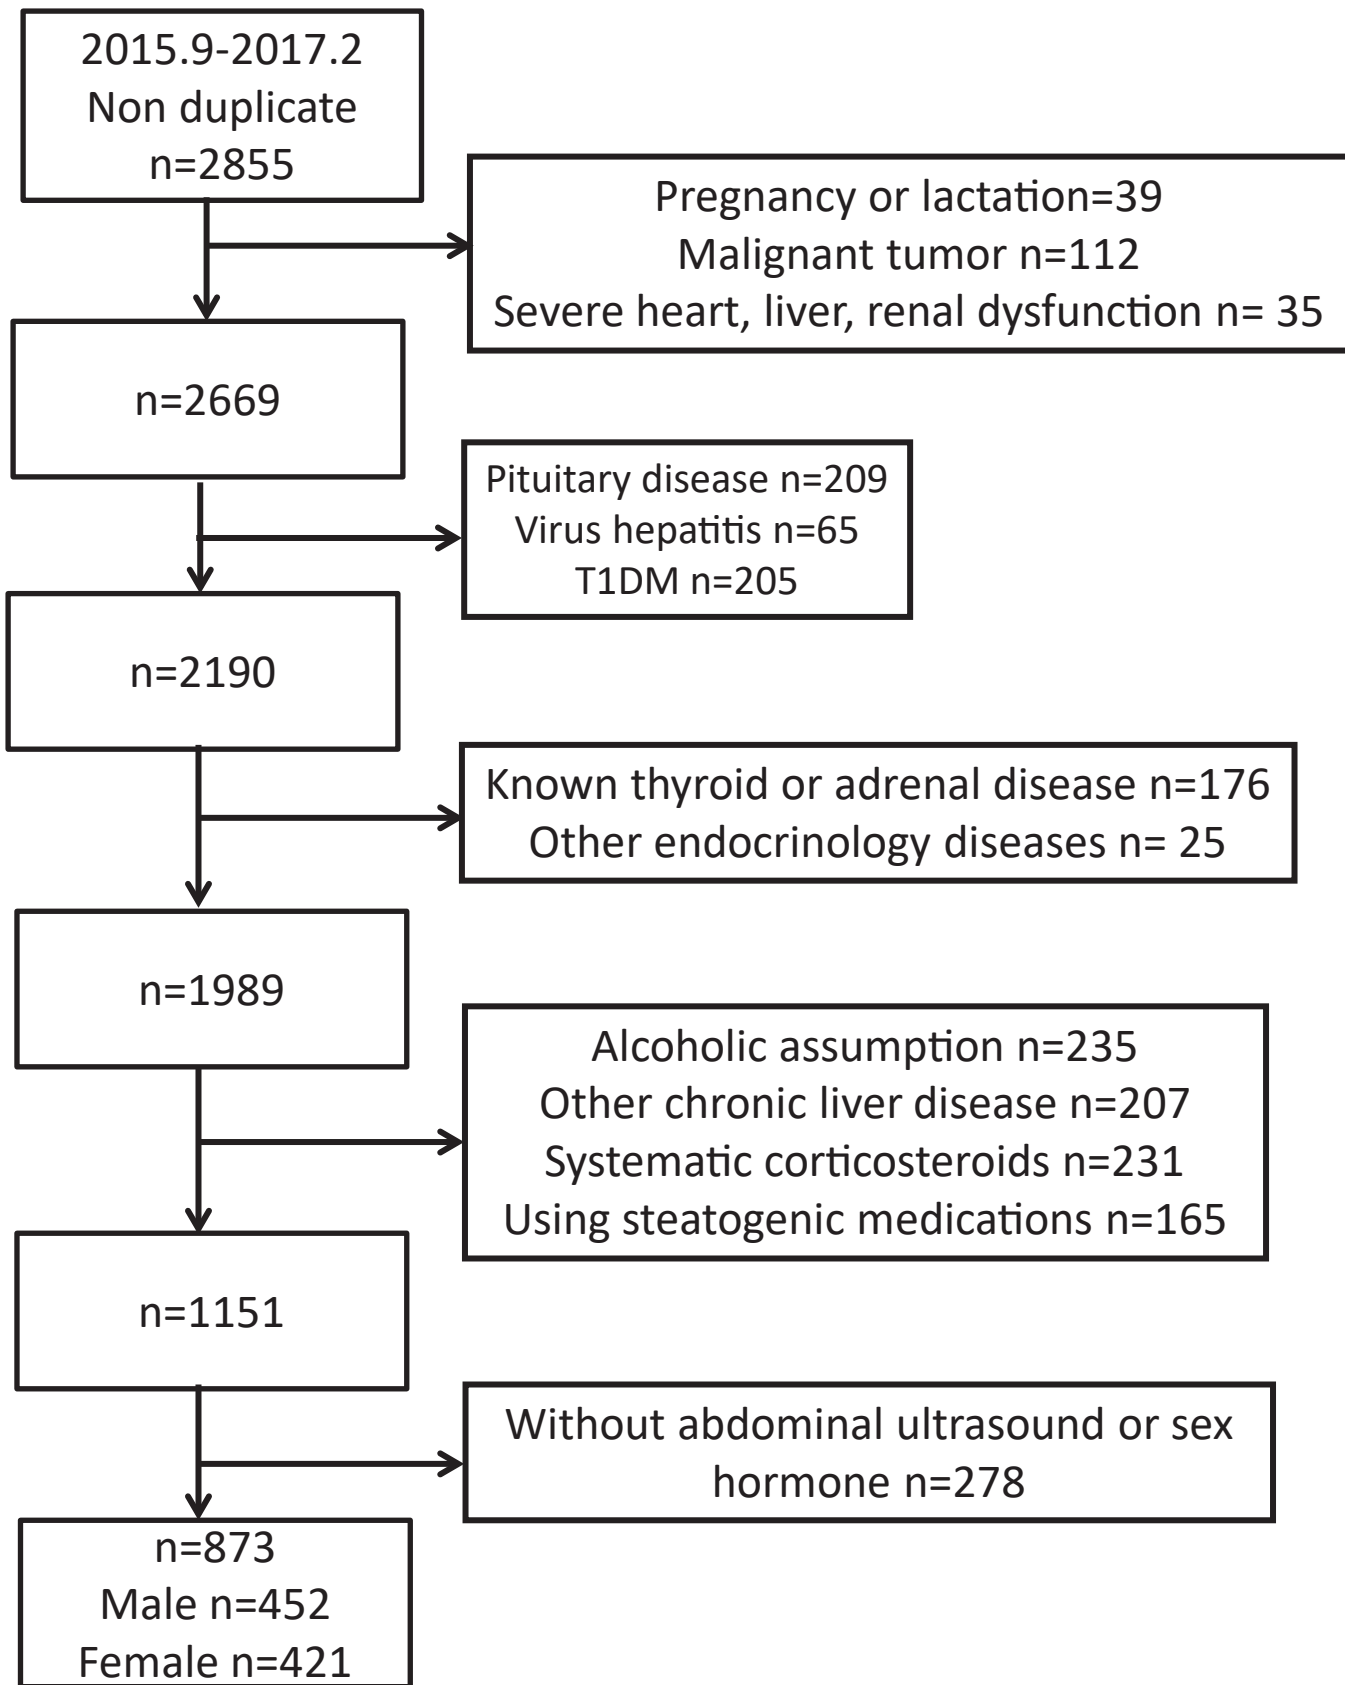

Supplement: MOESM1 [file 17439952]
